# Supplementary material
Source: Elsevier journal article supplement (https://www.sciencedirect.com/science/article/pii/S0213911118300438)
Supplement: mmc1 [file S0213911118300438:mmc1.docx]

**Apéndice**

**Tabla I**

Descripción de las categorías de los problemas relacionados con la medicación

| **Problema** | **Descripción** |
| --- | --- |
| Error de prescripción | Errores de prescripción relacionados con la utilización incorrecta de la orden médica informatizada |
| Interacción | Asociación inadecuada de fármacos |
| Necesidad de ajuste de dosis según función renal o hepática | Problema farmacocinético que requiere ajuste de dosis |
| Sobredosificación | Dosis de fármaco demasiado alta |
| Infradosificación | Dosis de fármaco demasiado baja |
| Fármaco no incluido en la guía farmacoterapéutica | Prescripción de un fármaco no disponible en el formulario del hospital |
| Duplicidad terapéutica | Duplicidad inadecuada de grupo terapéutico o de principio activo |
| Frecuencia de administración inadecuada | Frecuencia de administración excesiva o insuficiente |
| Defecto de efecto | Prescripción de un fármaco con actividad limitada para la indicación en la que está prescrito |
| Principio activo inexistente | Nueva condición clínica no tratada o falta de utilización de un fármaco sinérgico/preventivo necesario |
| Forma farmacéutica inadecuada | Prescripción de una forma farmacéutica de liberación convencional en sustitución de *retard,* o viceversa |
| Principio activo innecesario | Fármaco sin indicación actual |
| Duración de tratamiento incorrecta | Duración del tratamiento demasiado prolongada o corta |
| Exceso de efecto | Prescripción de un fármaco con actividad excesiva para la indicación en la que está prescrito |
| Horas de administración inadecuadas | Momento de la administración inadecuado |
| Vía de administración inadecuada | Vía de administración inapropiada o subóptima |
| Forma de administración inadecuada | Incompatibilidad con el diluyente indicado, velocidad de administración incorrecta, trituración de formas farmacéuticas no triturables... |
| No monitorización de concentraciones plasmáticas | No monitorización de fármacos de estrecho margen terapéutico o de aquellos en que el conocimiento de las concentraciones implica una optimización de la pauta (efectividad o seguridad) |
| Otros problemas relacionados con la medicación | Alteraciones de parámetros analíticos derivados del tratamiento con el fármaco, fármaco contraindicado, alergia al fármaco, fármaco de efectividad dudosa (de acuerdo con la evidencia clínica disponible) |
